# Supplementary material
Source: PubMed Central journal article supplement (PMC4790476)
Supplement: colm004749.ww1_default.pdf [file colm004749.ww1_default.pdf]

## **Appendix 1: Safety data – minor adverse events**

One participant was admitted to hospital one week following colonoscopy with a bacterial gastroenteritis (later shown to be related to food contamination with salmonella), which was complicated by an intravenous catheter infection; one participant experienced abdominal pain following the colonoscopy procedure in recovery that settled without intervention.

There was a very small increase in mean serum creatinine from 122.1 (standard deviation 47.2) to 124.4 (50.6)  $\mu\text{mol/L}$  ( $p=0.03$ , paired students t test); as noted in the manuscript there was no significant change in estimated glomerular filtration rate.

Three participants had unexplained increases in serum creatinine of  $>30\%$ ; all returned to baseline within one month. One additional participant had an increase of  $>30\%$  associated with a urinary tract infection which later resolved.

**Appendix 2: Staging and location information for the five screen-detected cases of colorectal cancer**

| <b>Case</b> | <b>Location</b>  | <b>Faecal haemoglobin result</b> | <b>Procedure</b>             | <b>TNM classification</b> | <b>AJCC stage</b> |
|-------------|------------------|----------------------------------|------------------------------|---------------------------|-------------------|
| 1           | Rectum           | Negative                         | Transendoscopic microsurgery | pT1 N0 M0                 | I                 |
| 2           | Transverse colon | Positive                         | Right hemicolectomy          | pT3 N0 M0                 | IIA               |
| 3           | Sigmoid colon    | Positive                         | Polypectomy                  | pT1 N0 M0                 | I                 |
| 4           | Descending colon | Positive                         | Left hemicolectomy           | pT3 N0 M0                 | IIA               |
| 5           | Caecum           | Negative                         | Right hemicolectomy          | pT1 N0 M0                 | I                 |

Abbreviations – TNM: tumour, nodes, metastasis staging; pT~: pathological tumour classification, i.e. classified according to histology; AJCC: American Joint Committee on Cancer

### Appendix 3: Distribution of colorectal neoplastic lesions in study participants

|                                                         | <i>Number of cancers/adenomas (%)</i> |                    |                        |                          | <i>Total in location (%)</i> |
|---------------------------------------------------------|---------------------------------------|--------------------|------------------------|--------------------------|------------------------------|
|                                                         | Cancers                               | Advanced Adenomas* | Non-advanced Adenomas† | Total Advanced Neoplasia |                              |
| Proximal colon (caecum, ascending and transverse colon) | 2 (40.0%)                             | 10 (34.5%)         | 27 (38.6%)             | 12 (35.2%)               | 39 (37.5%)                   |
| Distal colon (descending and sigmoid colon)             | 2 (40.0%)                             | 17 (58.6%)         | 35 (50.0%)             | 19 (55.9%)               | 54 (51.9%)                   |
| Rectum                                                  | 1 (20.0%)                             | 2 (6.9%)           | 8 (11.4%)              | 3 (8.8%)                 | 11 (10.6%)                   |
| <b>Total</b>                                            | <b>5</b>                              | <b>29</b>          | <b>70</b>              | <b>34</b>                | <b>104</b>                   |

\*Includes one tubulovillous adenoma diagnosed in a participant with cancer.

†Includes all adenomas found in all participants with any type of neoplasia.

#### Appendix 4: Prevalence of non-neoplastic colorectal disease in study participants

| Non-neoplastic disease | Primary screening diagnosis (n=229)            |                      |               |
|------------------------|------------------------------------------------|----------------------|---------------|
|                        | Number of participants (% of whole population) |                      |               |
|                        | No Neoplasia (n=157)                           | Any neoplasia (n=72) | Total (n=229) |
| Diverticular disease   | 52 (22.7%)                                     | 24 (10.5%)           | 76 (33.2%)    |
| Unspecified polyp(s)   | 15 (6.6%)                                      | 5 (2.2%)             | 20 (8.7%)     |
| Hyperplastic polyp(s)  | 14 (6.1%)                                      | 8 (3.5%)             | 22 (9.6%)     |
| Hemorrhoids            | 19 (8.3%)                                      | 4 (1.7%)             | 23 (10.0%)    |
| Angiodysplasia         | 2 (0.9%)                                       | 1 (0.4%)             | 3 (1.3%)      |
| Other                  | 8 (3.5%)                                       | 0                    | 8 (3.5%)      |

Note: up to 4 separate diagnoses were recorded for each participant at colonoscopy
